# Supplementary material for: Protective Effect of Topiramate against Diabetic Retinopathy and Computational Approach Recognizing the Role of NLRP3/IL-1β/TNF-α Signaling
Source: MDPI journal article supplement (doi:10.3390/biomedicines11123202), 2023-12-01
Supplement: s1 [file s1]

|   |                                                                                                                                                                                                                                                                                                                                                                                          |  |
|---|------------------------------------------------------------------------------------------------------------------------------------------------------------------------------------------------------------------------------------------------------------------------------------------------------------------------------------------------------------------------------------------|--|
| A | 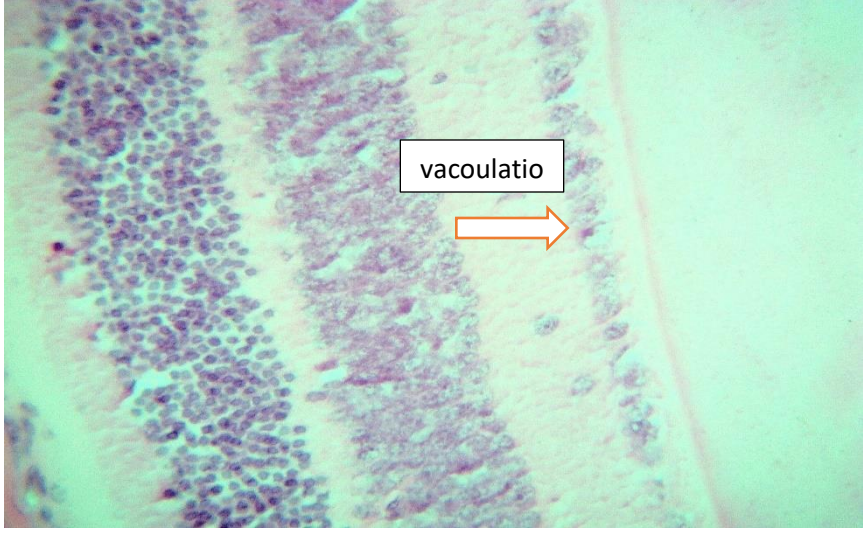 <p>Micrograph A shows a histological section of tissue at 400x magnification. The ganglion cell layer is disorganized, and there is visible vacuolation. An orange arrow points to a specific area of vacuolation, which is labeled with a text box containing the word "vacoulatio".</p>             |  |
| B |  <p>Micrograph B shows a histological section of tissue at 400x magnification. The ganglion cell layer is disorganized, and there are visible pyknotic nuclei. A red arrow points to a specific area of pyknotic nuclei, which is labeled with a text box containing the words "Pyknotic nuclei".</p> |  |
|   | <p>Supplementary 1. Image shows disorganized ganglion cell layer and vacuolation (panel A) and pyknotic nuclei (panel B) at high power (400x).</p>                                                                                                                                                                                                                                       |  |
